# Using Facebook groups to support families: midwives' perceptions and experiences of professional social media use

Holly Morse <sup>¶</sup>\*<sup>1,2</sup>, Amy Brown <sup>¶</sup><sup>1,2</sup>

1. Department of Public Health, Policy and Social Sciences, Swansea University, Singleton Park, SA2 8PP, UK
2. Centre for Lactation, Infant Feeding and Translation research (LIFT), Swansea University, Singleton Park, SA2 8PP, UK

\* Corresponding author

E-mail: [332932@swansea.ac.uk](mailto:332932@swansea.ac.uk) (HM)

<sup>¶</sup>These authors contributed equally to this work.

NOTE: This preprint reports new research that has not been certified by peer review and should not be used to guide clinical practice.

## 27 **Abstract**

28 Seeking support from Facebook groups during pregnancy is now widespread and  
29 social media has been widely used by maternity services during the COVID-19 pandemic.  
30 Despite this, little is currently known about midwives' attitudes towards, and experiences of  
31 social media in practice. Research is needed to understand barriers and solutions to meeting  
32 mothers' expectations of online support and to improve services.

33

34 This study explored midwife involvement in Facebook groups, exploring experiences and  
35 perceptions of its use to communicate with and support mothers. 719 midwives and student  
36 midwives completed an online survey during August- September 2020 and their numerical  
37 and free-text responses analysed descriptively.

38

39 Few participants were involved in providing Facebook support, and most of these were  
40 unpaid. There was a consensus on a range of benefits for mothers, but widespread concern  
41 that engaging with mothers online was a personal and professional risk, underpinned by a  
42 lack of support. Experience of being involved in midwife moderation increased belief in its  
43 benefits and reduced fear of engaging online, despite a lack of remuneration and resources.  
44 Midwives and students felt they were discouraged from offering Facebook support and  
45 sought further training, guidance and support.

46

47 Although limited, experiences of providing Facebook group support are positive.

48 Perceptions of risk and a lack of support are significant barriers to midwives' involvement in

49 using Facebook groups to support mothers. Midwives seek support and training to safely  
50 and effectively engage with mothers using Facebook.

51

52 Engaging with mothers via social media is embedded in national policy and digital strategy,  
53 and progress is needed to fulfil these, to improve services and meet mothers' expectations.

54 Midwives' experiences suggest extending opportunities to provide Facebook support would  
55 benefit midwives, services and families. Consultation to revise local policy to support  
56 midwives and students in line with strategic goals is recommended.

57

## 58 **Author Summary**

59 Social media use continues to grow and we know that use among pregnant and new parents  
60 for peer support and accessing information is widespread. Previous research suggests  
61 however that they can find it difficult to know which information to trust, and would like to  
62 engage with their midwives online. However, little was known about how many midwives  
63 are supporting families via social media, or what their experiences of this are. Nor did we  
64 know what the perceptions of developing this service are amongst the workforce. Here, we  
65 used an online survey to explore these attitudes and perceptions. We found that although  
66 few midwives are engaging with families on social media, those that do have positive  
67 experiences. Many fear that a lack of support and guidance presents risks to themselves and  
68 to families, but recognised the potential benefits to developing the service. We also found  
69 that midwives would like to receive more training to deliver services online and engage  
70 safely on social media. Our study provides new insights that can be used to improve support  
71 for midwives and to realise the potential of social media in midwifery care.

72

## 73 **Introduction**

74 There is a high level of public demand for responsive, evidence-based online health services  
75 [1] and the potential for these to improve care and increase efficiency is well documented  
76 [2]. Despite strategic emphasis on the digital transformation of the NHS, progress remains  
77 slow, particularly within maternity services [3]. However, digital technology was quickly  
78 utilised by services to play a vital role in disseminating information and communicating with  
79 families in response to the outbreak of COVID-19 [4], and work is needed to evaluate and  
80 maintain advances [3].

81

82 The popularity of Facebook support groups with pregnant and new mothers has grown  
83 rapidly in line with the increasing social media use amongst this demographic [5]. This use of  
84 peer-led online communities offers access to shared experience and social and emotional  
85 support that women find invaluable during the transition to parenthood [6]. However,  
86 whilst highly valuing them for social support, they encounter issues with whether the health  
87 information shared within online groups has any credible evidence base [7]. Inaccuracy and  
88 the sharing of misinformation within online groups is common which can heighten anxiety  
89 and increase help seeking from professionals [8,9]. Professionally mediated support offers a  
90 solution: facilitating peer support, relationship building and knowledge acquisition within an  
91 online community whilst addressing any inaccurate or misleading information [10]. Mothers  
92 seek this online support from midwives, and it improves their experience of midwifery care,  
93 and feedback on local maternity services [11].

94

95 Engagement on social media by NHS health professionals, to inform and empower service  
96 users, has been deemed critical for over a decade [12,2]. To facilitate this, sectors like  
97 pharmacy and dentistry have seen a growth in research into the issues surrounding digital  
98 professionalism [13,14]. The skills and professionalism required by nurses engaging online  
99 has more recently been explored [15,16], and training introduced to pre-registration  
100 programmes [17]. However, there is reluctance amongst midwifery educators to adopt such  
101 programmes [18]. Limited research suggests perceptions of the risks amongst midwives, and  
102 a lack of training present significant barriers to developing social media support more widely  
103 in maternity services [19,16].

104

105 The provision of midwife moderated Facebook groups offers maternity services an  
106 opportunity to develop support and health engagement, improving outcomes and  
107 experiences [20,11]. However, little is known about how midwives perceive and experience  
108 this form of communication and support, and no literature has been identified that explores  
109 any training or support offered to midwives related to this developing role. This study  
110 therefore aimed to explore midwives' and student midwives' attitudes towards, and any  
111 experiences of, delivering support to mothers via Facebook. Developing an understanding of  
112 barriers to developing this provision will help inform practice and education, supporting  
113 midwives to engage safely and effectively with digital support services. Specifically, the  
114 study sought to explore:

115

- 116 1. How are midwives using Facebook and what are their perceptions of professional  
117 social media use?

- 118 2. What are midwives' experiences of, and concerns about offering social media  
119 support?  
120 3. What training needs relating to social media and breastfeeding support do midwives  
121 have?

122

## 123 Results

### 124 Participants

125 Seven hundred and nineteen midwives and student midwives completed the online  
126 questionnaire. The participants fell into all provided age ranges, from 18 years to over 60  
127 years (mean age range 22-30, median 31-40 years). The majority of participants identified as  
128 either White or White British (93%) and female (98.9%). This reflects the demographics of  
129 UK midwives [21]. Further details can be found in Table 1.

130

131 **Table 1. Demographics of respondents**

132

| Indicator | Group                                                          | N   | %    |
|-----------|----------------------------------------------------------------|-----|------|
| Age       | 18-21                                                          | 73  | 10.4 |
|           | 22-30                                                          | 229 | 32.6 |
|           | 31-40                                                          | 207 | 29.4 |
|           | 41-50                                                          | 118 | 16.8 |
|           | 51-60                                                          | 64  | 8.9  |
|           | 60+                                                            | 12  | 1.7  |
| Gender    | Female                                                         | 695 | 98.9 |
|           | Male                                                           | 6   | 0.9  |
|           | Self-defined                                                   | 2   | 0.3  |
| Ethnicity | Asian or Asian British [Indian, Bangladeshi, Pakistani, Other] | 5   | 0.6  |
|           | Chinese                                                        | 0   | 0    |
|           | Black/Black British                                            | 10  | 1.4  |
|           | Irish                                                          | 11  | 1.6  |

|  |                     |     |      |
|--|---------------------|-----|------|
|  | Mixed or multiple   | 18  | 2.6  |
|  | White/White British | 654 | 93.0 |
|  | Other               | 5   | 0.7  |

133

134 Participants were asked to provide details of how long they had been qualified as a midwife  
135 (or were currently a student) and to indicate their current role. At the time of survey  
136 completion, over a third (36.2%, n = 260) were student midwives. For qualified midwives (n  
137 = 459), time since registration ranged from 0-20+ years, with 63.1% having been qualified 10  
138 years or less. Overall, twice as many qualified midwives were based in hospital (30.2%) as  
139 were based in a community setting (clinic/home based care) (14.7%). Those with specialist  
140 roles (16.4%) were asked to give details, with infant feeding being the most commonly  
141 specified role (13.6%). A chi square found that those in specialist roles were significantly  
142 more likely to be providing Facebook support than those who were not in specialist roles [ $X^2$   
143 = 20.067, p = .000].

144

## 145 **Facebook use**

146 Participants were asked to indicate whether they used Facebook and type of use [none,  
147 personal use and/or connecting with other professionals, to offer women support], selecting  
148 all that applied. Personal use and connecting with other professionals was the most  
149 common type of use (41%, n = 295), followed by personal use only (36.4%, n = 262). Overall,  
150 103 (14.3%) used Facebook to professionally support pregnant/postnatal women, usually  
151 alongside other personal and professional use (74.8%, n = 77) and 1.3% (n = 9) did not use  
152 Facebook. Participants who reported using Facebook were split into two groups for further

153 analysis: those providing Facebook support (14.6%, n= 100) and personal/social use  
 154 combined (85.4%, n = 584).  
 155  
 156 Using a five-point Likert scale [strongly agree to strongly disagree], participants were asked  
 157 to indicate how they felt about a series of statements, including their trust in Facebook,  
 158 whether significant people in their life were Facebook users, whether Facebook helped  
 159 them learn from other professionals and if Facebook support could improve care for  
 160 women. These results were compared for the two groups [personal/social and support].  
 161 Providing support was significantly associated with perceptions of trust, connection and  
 162 improvements in care, confidence in online professionalism and being happy interacting  
 163 with mothers online (Table 2).

164

165 **Table 2. Statements on Facebook use**

| Type of Facebook use                                 | Personal/Social      |      | Support              |      | Significance               |
|------------------------------------------------------|----------------------|------|----------------------|------|----------------------------|
|                                                      | Strongly Agree/Agree |      | Strongly Agree/Agree |      |                            |
| Perception of FB use                                 | N                    | %    | N                    | %    |                            |
| I trust FB with my information                       | 146                  | 25.9 | 37                   | 41.6 | t [650] = 3.596, p = .000  |
| Enables me to connect/learn from other professionals | 449                  | 80.2 | 83                   | 93.3 | t [647] = 3.948, p = .000  |
| Friends/family are FB users                          | 429                  | 76.3 | 67                   | 75.3 | t [649] = .742, p = .459   |
| Social benefits                                      | 482                  | 85.8 | 78                   | 87.6 | t [649] = 1.134, p = .257  |
| Convenient & easy to use                             | 540                  | 96.1 | 83                   | 93.3 | t [649] = .231, p = .818   |
| Confident in staying professional online             | 480                  | 85.4 | 84                   | 94.4 | t [649] = 2.793, p = .005  |
| Happy to interact with mothers                       | 178                  | 31.7 | 75                   | 84.3 | t [649] = 10.311, p = .000 |
| Facebook use can improve care                        | 268                  | 47.7 | 81                   | 91.0 | t [649] = 8.818, p = .000  |
| Also use other social media                          | 440                  | 78.3 | 68                   | 76.4 | t [649] = 649, p = .073    |



166

## 167 **Facebook support roles**

168 All participants were asked if their NHS health board/trust had official Facebook groups used  
169 by midwives to support local women. Of 517 responses, 296 (57.3%) did, 140 (27.1%) did  
170 not and 81 (15.7%) were unsure. Of those providing online support 63 (72.4%) were aware  
171 of or involved in their local NHS affiliated group. Participants were also asked if they had  
172 only started providing a Facebook support role as a result of the COVID-19 pandemic. This  
173 was the case for 13 (14.8%) participants. Those participants not providing support were  
174 asked if they would consider the role in future. Overall, of 393 completed responses, 56%  
175 felt they would or may, and 44% indicated they would not.

176

177 Participants with involvement in Facebook support indicated what their group offered, and  
178 their responsibilities in relation to the role. A combination of antenatal and postnatal  
179 support, including breastfeeding support, was most common (36.4 %, n = 32), 14 (15.9%)  
180 provided specialist support e.g. for NICU or parents of multiples and 13 (14.8%) were  
181 breastfeeding support groups. In relation to responsibilities, contributing to discussion by  
182 posting and responding to women's posts alone was the most common (27.3%) followed by  
183 involvement in setting up the group, moderating discussion and responding to posts  
184 (22.7%). Overall, 18.2% (n = 16) were involved in discussion and moderation alone and  
185 20.5% (n = 18) specified other responsibilities using a free text box. These included  
186 responsibility for promotion of their NHS or independent services using Facebook pages  
187 (rather than support groups), running support groups for professionals/students and  
188 involvement in digital intervention projects.

189

190 Participants were asked to indicate whether they were required to offer Facebook support  
191 as part of their employed role as a midwife. Overall 31.0% (n = 27) did so within their role,  
192 and (62.1%, n = 54) chose to do so outside of their employed role . The remainder (n = 7)  
193 were student midwives. Participants were also asked how many hours they spent on their  
194 Facebook role in an average week and what proportion, if any, they were paid for. Two to  
195 four hours was the most common weekly time spent on the role (35.1%, n = 26) with 4.1%  
196 (n = 3) spending over 30 hours. The majority were offering support outside of their  
197 employed role and not being paid for it (73.6%, n= 39) and only 32% (n=8) of those  
198 employed to offer Facebook support were fully reimbursed.

199

200 When asked how long they had been involved in providing Facebook support, most  
201 participants had been doing this role between 1-3 years (37.5%, n = 33), with 12.5% (n = 11)  
202 having started within the previous three months (during the pandemic), and 27.5% (n= 22)  
203 for over three years. Of those offering support as part of their employed role, most had  
204 been doing so under one year (59.2%, n = 16). Those midwives offering Facebook support  
205 outside their role had most often been doing so over a year (77.4%, n = 41).

206

## 207 **Perceptions of Facebook support**

208 Participants were asked to rate a series of statements of positive impacts of mothers' and  
209 midwives' use of Facebook support groups using a five-point Likert scale [strongly agree to  
210 strongly disagree]. These statements focused on elements of knowledge acquisition and  
211 social capital. These responses were compared for the two types of Facebook use

212 (personal/social and support (Table 3). On mothers' use, there was a consensus of  
 213 agreement with all statements, and strong agreement with the ability of Facebook support  
 214 to provide peer support (95.3%) and access to shared experience (97.4%). Participants were  
 215 less likely to agree with positive impacts on continuity of care (50.2%) and improvements in  
 216 breastfeeding rates (60.6%). Participants who provided Facebook support reported  
 217 significantly greater agreement with all statements, including improved feedback,  
 218 communication, self-efficacy, confidence and knowledge ( $p = <0.05$ ).

219

220 **Table 3. Perceptions of Facebook support group use**

| Facebook use type                       | Personal/social      |          | Support              |          | Significance              |
|-----------------------------------------|----------------------|----------|----------------------|----------|---------------------------|
|                                         | Agree/Strongly Agree |          | Agree/Strongly Agree |          |                           |
| Perception of midwives' involvement     | N                    | %        | N                    | %        |                           |
| Help midwives signpost services         | 380                  | 90.5     | 84                   | 97.7     | t (505) = 5.246, p = .000 |
| Improve connection with mothers         | 308                  | 73.3     | 74                   | 86.0     | t (503) = 4.018, p = .000 |
| Increase midwives' knowledge            | 260                  | 61.9     | 78                   | 90.7     | t (504) = 5.840, p = .000 |
| Improve communication with mothers      | 320                  | 76.2     | 72                   | 83.7     | t (503) = 3.846, p = .000 |
| Require only basic IT/digital skills    | 340                  | 81.0     | 69                   | 80.2     | t (505) = .776, p = .438  |
| Are a positive experience for midwives  | 168                  | 40.0     | 59                   | 68.6     | t (504) = 4.773, p = .000 |
| Improve connections between midwives    | 287                  | 68.3     | 65                   | 75.6     | t (503) = 2.845, p = .005 |
| <b>Perceptions of impact on mothers</b> |                      |          |                      |          |                           |
| <b>Perception</b>                       | <b>N</b>             | <b>%</b> | <b>N</b>             | <b>%</b> |                           |
| Improve knowledge                       | 347                  | 82.4     | 84                   | 97.7     | t (503) = 5.129, p = .000 |
| Increase confidence                     | 333                  | 79.1     | 83                   | 96.5     | t (503) = 6.151, p = .000 |
| Help provide peer support               | 387                  | 91.9     | 85                   | 98.8     | t (504) = 4.452, p = .000 |
| Improve self-efficacy                   | 360                  | 85.5     | 83                   | 96.5     | t (502) = 5.465, p = .000 |
| Improve continuity of care              | 178                  | 42.3     | 50                   | 58.1     | t (505) = 3.398, p = .001 |
| Enable sharing of experiences           | 404                  | 96.0     | 85                   | 98.8     | t (504) = 5.248, p = .000 |
| Improve breastfeeding rates             | 222                  | 52.7     | 59                   | 68.6     | t (505) = 3.834, p = .000 |
| Improves communication                  | 255                  | 60.6     | 67                   | 77.9     | t (504) = 4.293, p = .000 |
| Improves feedback                       | 331                  | 78.6     | 78                   | 90.7     | t (505) = 3.733, p = .000 |

221

222

223 Participants were also asked to rate a series of statements about midwives' professional use  
 224 of Facebook support groups, using a five-point Likert scale [strongly agree to strongly  
 225 disagree]. For only basic IT skills being needed, those in the support group were less likely to  
 226 strongly agree (M = 2.02, SD = .958), although this was not significant (p = .438). Participants  
 227 providing support reported significantly greater agreement with all other statements (p =  
 228 <.0.05).

229

### 230 **Concerns about providing Facebook support**

231 All participants were asked to indicate whether and to what extent a list of personal and  
 232 professional issues were of concern to them in relation to providing Facebook support as a  
 233 midwife [very concerned - not a concern] (Table 4). The personal/social group reported  
 234 significantly greater concerns compared to support providers for personal privacy, increased  
 235 workload/stress, becoming emotionally involved and overstepping boundaries.

236

237 **Table 4: Concerns about providing FB group support**

| Facebook use type |                                      | Personal/social |      | Support        |      | Significance               |
|-------------------|--------------------------------------|-----------------|------|----------------|------|----------------------------|
|                   |                                      | Concerned<br>N  | %    | Concerned<br>N | %    |                            |
| Personal          | Personal privacy                     | 338             | 81.1 | 52             | 61.2 | t [505] = -4.090, p = .000 |
|                   | Digital competence                   | 147             | 35.3 | 31             | 36.5 | t [504] = .449, p = .653   |
|                   | Criticism from colleagues            | 260             | 62.4 | 38             | 44.7 | t [505] = -2.625, p = .009 |
|                   | Ensuring my advice is evidence based | 301             | 72.2 | 60             | 70.6 | t [503] = -.999, p = .318  |
|                   | Increased workload/stress            | 274             | 65.7 | 48             | 56.5 | t [502] = -3.266, p = .001 |
|                   | Becoming emotionally involved        | 254             | 60.9 | 39             | 45.9 | t [501] = -3.597, p = .000 |
|                   | Overstepping boundaries              | 324             | 77.7 | 42             | 49.4 | t [501] = -6.387, p = .000 |

|              |                                             |     |      |    |      |                            |
|--------------|---------------------------------------------|-----|------|----|------|----------------------------|
| Professional | Posting publicly in case of error/complaint | 355 | 85.1 | 47 | 55.3 | t [503] = -5.662, p = .000 |
|              | Being reported to the NMC/my employer       | 305 | 73.1 | 34 | 40.0 | t [500] = -6.222, p = .000 |
|              | Ensuring mothers' confidentiality           | 311 | 74.6 | 43 | 50.6 | t [500] = -4.719, p = .000 |
|              | Lack of guidance for moderating groups      | 351 | 84.2 | 44 | 51.8 | t [500] = -7.529, p = .000 |
|              | Lack of employer support                    | 317 | 76.0 | 44 | 51.8 | t [499] = -4.782, p = .000 |
|              | Managing conflict online                    | 347 | 83.2 | 44 | 51.8 | t [501] = -7.165, p = .000 |

238

239 There was a consensus of opinion on all areas of professional concern, with lack of guidance  
 240 for moderating groups and public posting for fear of error or complaint being most strongly  
 241 felt. Other concerns included being reported to the NMC/employer, lack of employer  
 242 support and managing online conflict. Overall around two thirds to three quarters of the  
 243 personal/social group held professional concerns compared to around half of those in the  
 244 support group.

245

## 246 **Training and support for Facebook roles**

247 Participants were asked to indicate whether they had received any training relating to social  
 248 media use, and if they would find this useful. Few participants had received any relevant  
 249 training. Any training was perceived as potentially useful by the majority of participants,  
 250 whether they had received any training in the past or not. Of those who were providing  
 251 Facebook group support, 9 (10.8%) had received digital skills training, 15 (18.1%) had  
 252 received social media training and 15 (18.1%) had received e-professionalism training. Being  
 253 involved in Facebook support was not significantly associated with having received any  
 254 training. Just 22.2% of those providing support had received written local guidelines for  
 255 their role, with 76.1% believing these would be useful.

256

257 Participants were asked whether they felt any of a list of professional and managerial

258 sources were supportive of midwives providing Facebook support to mothers (Table 5).

259 Overall, work colleagues were seen as supportive most often and NHS health board/trust

260 management the least. Those involved in providing support reported greater perceptions of

261 support for the role, than the personal/social group.

262

263 **Table 5: Perceptions of professional support for FB group roles**

| Facebook use type                    | Personal/<br>social      |      | Support                 |      | Significance              |
|--------------------------------------|--------------------------|------|-------------------------|------|---------------------------|
|                                      | Agree/ Strongly<br>Agree |      | Agree/Strongly<br>Agree |      |                           |
| Source                               | N                        | %    | N                       | %    |                           |
| Facebook group guidelines            | 133                      | 32.2 | 44                      | 51.8 | t [498] = 3.298, p = .001 |
| Health board/NHS trust<br>Management | 114                      | 27.6 | 30                      | 35.3 | t [494] = 2.617, p = .009 |
| NMC social media guidance            | 167                      | 40.4 | 44                      | 51.8 | t [494] = 1.941, p = .053 |
| The Royal College of Midwives        | 181                      | 43.8 | 40                      | 47.1 | t [495] = 1.053, p = .293 |
| Work Colleagues                      | 176                      | 42.6 | 53                      | 62.4 | t [494] = 2.180, p = .030 |
| Universities/<br>midwifery educators | 175                      | 42.4 | 37                      | 43.5 | t [492] = -.579, p = .093 |

264

265 Participants provided further detail on their views, concerns, reasoning and experiences via

266 a free text box. Thematic analysis identified three overarching themes: Progress, Threat and

267 Barriers.

268

269 **1. Progress**

270 The concept of Facebook support as progress, encompassed perceptions of positive, or  
271 potential positive impacts on the maternity service, on women and on midwives. Some  
272 participants described the provision of midwife led Facebook support as improving  
273 maternity services and care for women. This included increased engagement, improved  
274 feedback and the development of services to meet strategic and service user expectations,  
275 particularly in the context of the COVID-19 pandemic.

276

277 *“A positive has been that women have shared their birth stories with thanks*  
278 *and appreciation for the great care they have received- this improved morale*  
279 *for the midwives and provided other mums to be with some reassurance.”*

280 (Birth centre midwife)

281

282 *“We are in an age of social media. People expect to be able to use these*  
283 *methods to communicate. As service providers we need to be able to adapt*  
284 *and use the same platforms as our service users to ensure we provide*  
285 *evidence based and accessible care.”* (Community midwife)

286

287 The use of Facebook groups to offer both professional and peer support within an online  
288 community, particularly where in person support had been affected by the coronavirus  
289 pandemic was also seen as positive. This encompassed antenatal, postnatal and infant  
290 feeding and included informational and social support.

291

292 *“The sense of community on social media platforms between expectant*  
293 *mothers has been a lot more apparent during lockdown as women have been*

294 *unable to attend face to face parentcraft/mother and baby classes etc and*  
295 *have been reaching out to each other a lot more online for advice and just*  
296 *general friendship.” (Student midwife)*

297

298 Midwives had observed positive impacts on self-efficacy and improved relational  
299 continuity.

300

301 *“Women have felt a little put out during this pandemic and I have noticed a*  
302 *lot of activity on a local health board website for feeding. It has been great to*  
303 *watch others peer support each other and midwives to continue with*  
304 *continuity that otherwise could have been lost.” (Hospital midwife)*

305

306 Participants described a belief in the potential of Facebook support to improve care and  
307 experiences for mothers and midwives, including breaking down barriers and continuity of  
308 care.

309

310 *“I’d love to (give FB support)! Think it would bring down a lot of the unequal*  
311 *power dynamics that are implicit by being a HCP.” (Hospital midwife)*

312

313 Several described how it improved their own job satisfaction by enabling relationship  
314 building.

315



316 *“Women who have had support from me on my personal midwife Facebook page,*  
317 *allow me to provide continuity of care and achieve a sense of fulfilment from*  
318 *being a midwife that my job no longer gives.”* (Community midwife)

319

## 320 **2. Threat**

321 The concept of Facebook support as a being a ‘threat’ encompassed perceptions of  
322 potential negative impacts or risks to the maternity service, on women and on midwives.  
323 Participants described how engaging with Facebook created opportunities for negative  
324 feedback and challenges in managing responses, which impacted personal wellbeing and  
325 wider staff morale.

326

327 *“It’s a great idea however, trust is then up for public verbal abuse and*  
328 *becomes frustrating when you can’t challenge the ‘keyboard warriors’.”*  
329 (Hospital midwife)

330

331 Offering support via Facebook was also considered a potential threat to women’s  
332 access to individualised information and care, or as a way to justify reductions in  
333 service provision. Participants feared being held accountable for this.

334

335 *“[Social media support was] seen as temporary during extremis. When all*  
336 *face-to-face meetings can resume the concern is that they will not - women*  
337 *will be left with inadequate levels of care and midwives held responsible for*  
338 *mopping up issues via Facebook. It’s another NHS care scandal waiting to*  
339 *happen.”* (Hospital midwife)

340

341 Participants also described concerns that social media groups pose a threat to appropriate  
342 and effective information sharing, perpetuating false information with the potential for  
343 adverse outcomes.

344

345 *“It's impossible to gather all the information [in a Facebook group], other*  
346 *non-medical professionals give their opinion diluting the impact of the health*  
347 *care professionals' advice.” (Student midwife)*

348

349 Some perceived the use of Facebook as a threat to women's relationships with  
350 services/care providers, and the ability of professionals to communicate effectively  
351 and individually with them. There were beliefs that Facebook support groups offered  
352 false security and an obstacle to appropriate help-seeking.

353

354 *“Unfortunately [social media use] does mean there is a delay in some women*  
355 *accessing appropriate care, as they will message with a serious concern when*  
356 *the inbox is not manned (though it is widely publicised what times it is*  
357 *manned!)” (Community midwife)*

358

359 Participants had concerns about upholding their personal boundaries and the potential for  
360 the time, privacy and wellbeing of midwives to be threatened by engaging on social media.

361

362 *“It's difficult when you are seeing bad advice being given by others. I have*  
363 *also seen some quite unprofessional responses from the moderators of one*

364 *NHS run group which only served to fuel the fire...Then it feels almost*  
365 *personal when someone attacks as they are talking about you and your work*  
366 *colleagues.” (Hospital midwife)*

367

368 Experiences highlighting issues of professionalism, appropriate engagement and  
369 defensive practice, threatening professional reputations and wellbeing were shared.

370 Often the solution to these issues was seen as withdrawing from any public  
371 engagement.

372

373 *“Any advice given by midwives can and will be screenshotted, edited, shared*  
374 *on women's personal accounts, and has huge potential personal risk to*  
375 *midwives. I have seen many midwives berated and destroyed on social media,*  
376 *comments taken out of context... I don't think any interactions should be*  
377 *public”.* (Hospital midwife)

378

### 379 **3. Barriers**

380 Three distinct ‘Barrier’ themes to the use of social media to provide support were identified:  
381 fear, lack of training and lack of support. Fears were centred on the implications  
382 of engaging publicly on their status as a registered midwife, lack of guidance and clarity on  
383 appropriate use and accountability.

384

385 *“I would be mindful that my philosophy of practice does not marry with the*  
386 *expectations of some employers. I'd also be concerned about being judged by*  
387 *others who do not share similar approaches to care. I would feel I'd have to*

388           *“tow the line” in that I could only offer support and advice that is aligned with*  
389           *institutional midwifery care.”* (Midwife)

390

391 Fears relating to security and confidentiality, as well as the potential for being judged  
392 personally and professionally in public were widely held. Student midwives felt a lack  
393 of support through their education and were impacted by the conflicting attitudes.

394

395           *“Our lecturers have given us extremes of views on social media use... it has*  
396           *been confusing. Most of my cohort are like me, very worried about what we*  
397           *post online to the point where we probably wouldn’t. This would mean*  
398           *women miss out on that advice/connection. I think we need more training*  
399           *other than scaremongering. I think the NMC should have really clear-cut*  
400           *advice about...whether students/midwives should be using social media to*  
401           *connect and when it’s appropriate.”* (Student midwife)

402

403 Participants described how a lack of training designed to support and clarify the use of social  
404 media to enhance care presented a barrier to safe and confident use, cementing fears  
405 around professionalism.

406

407           *“I think we need to move away from the assumption social*  
408           *media=unprofessional, and all the training I’ve had or discussed with others*  
409           *have been about protecting yourself and defensiveness, not about safe usage*  
410           *or recommendations to improve care.”* (Community midwife)

411

412 It was also widely felt that there is a lack of support, hostility and resistance from  
413 employers, professional bodies and universities, presenting a barrier to Facebook to  
414 provide support.

415

416 *“I’ve only ever sought to connect women with services when they cannot*  
417 *reach them, correct misinformation, and reach out when there is clear*  
418 *distress. My employer responded by threatening me with referral to NMC for*  
419 *using Facebook on trust time and misrepresenting the trust online.”* (Hospital  
420 midwife)

421

## 422 **Discussion**

423 This study explored midwives’ and student midwives’ (referred to in the discussion jointly as  
424 ‘midwives’) attitudes toward, and experiences, of using Facebook to provide midwifery  
425 support. A growing body of research shows that women expect health services to use digital  
426 tools for support and communication, and that social media has the potential to improve  
427 these services [22,2]. Our study explored the barriers to this provision within maternity  
428 services, from the perspective of midwives. Consistent with other research [19,16], the  
429 findings show midwives are concerned about the risks of offering support to pregnant and  
430 new mothers online and seek more training and guidance to do so. However, those  
431 delivering support via Facebook viewed the role and its impact positively and had fewer  
432 concerns, despite a lack of guidance and resources. These findings have important  
433 implications for developing the guidance and support to safely deliver progress in utilising  
434 social media as a professional tool.

435

436 Seeking support on Facebook during pregnancy and early parenting is now widespread and  
437 has a wide range of benefits for mothers. Facebook support groups offer convenient access  
438 to highly valued social and emotional peer support, increasing confidence, knowledge  
439 acquisition and self-efficacy [23]. Midwives recognised that many mothers are now using  
440 Facebook in this way but were also aware that mothers have issues with recognising reliable  
441 information, and that the sharing of unhelpful, and, in some cases risky, advice is a common  
442 experience [8]. Our findings showed that many midwives saw midwife-moderation as a  
443 solution to validating information in Facebook groups, which is reflected in the literature  
444 [10]. However, others felt that this created or may create opportunities to undermine  
445 individual midwife-mother relationships and for mothers to challenge those providing their  
446 clinical care. This was not the experience of those actually involved in Facebook support,  
447 who viewed interactions as positive for mothers, midwives and services. These findings are  
448 important for considering how to incorporate midwives' experiences into training that  
449 addresses concerns and supports service development.

450

451 Belonging to a Facebook support group provides mothers with a support network and  
452 access to lived experience that is not always available to them within their local community.  
453 Groups that offer support to mothers located within specific geographic areas enable 'real  
454 life' connections to be built, fostering relationships that create social opportunities for  
455 mothers and babies and facilitating signposting to face to face support when needed [11].  
456 These mothers also have shared experiences of their maternity services and expect to  
457 receive updates and offer feedback on their care via social media. Midwives had mixed  
458 experiences of this, sharing the boost to morale of appreciation and positive engagement,

459 but also the impact of negative interactions, particularly in the context of changes related to  
460 COVID-19 [24]. Faced with inaccuracies, judgement or criticism about maternity care or  
461 services on Facebook midwives felt disempowered, and that they were did not have the  
462 guidance or support to engage constructively. These negative experiences on Facebook in  
463 general impacted midwives' attitudes towards Facebook support, despite not being seen in  
464 midwife-moderated groups [10]. Previous research found access to midwife moderated  
465 groups improved perceptions of midwifery support, improving feedback and experiences,  
466 including during the pandemic [25]. Findings suggest training should be developed to  
467 support professional and constructive interactions which promote positive relationships  
468 between families and services.

469

470 There was a consensus amongst midwives that relevant skills and knowledge training was  
471 lacking and would be useful, particularly in relation to digital professionalism. Midwives are  
472 socialised through their education and practice to understand what is expected of them  
473 [26], and the standards they must uphold to register, and remain registered, with the NMC  
474 [27]. This extends to online behaviours and interactions [28], and although midwives felt  
475 they were confident in staying professional online, they were less so about maintaining  
476 boundaries and how to ensure confidentiality. This underpinned midwives' fears that  
477 engaging online could prompt complaints and referral to their employer or the NMC,  
478 despite this being highly infrequent [18]. Universities were also seen as unsupportive;  
479 student midwives reported being warned against social media use during their education  
480 and felt frustration at defensive rather than proactive approaches. Previous research has  
481 noted resistance to introducing digital professionalism to the midwifery curriculum [18].

482 These findings are a concern, highlighting that midwives are often not receiving the support  
483 or training needed, pre- or post-registration, to meet digital transformation goals.

484

485 Although health professionals have long been encouraged to engage with service users on  
486 social media [12] midwives felt prevented from doing so by local policies and a lack of  
487 employer support. This is in line with previous research, which identified that whilst NHS  
488 strategy calls for greater engagement, professionals are discouraged by a focus on security  
489 and reputation [29]. Many midwives perceived any interaction with mothers on Facebook as  
490 inappropriate and unprofessional and most felt NMC [30] social media guidance did not  
491 support midwives to provide Facebook support. This reflects the generic referencing within  
492 the guidance of relationship building as unprofessional and inappropriate, despite improved  
493 relational continuity being a key benefit of midwife moderated Facebook groups [20]. These  
494 findings are important to consider in relation to the development of online support services,  
495 updating training and policies to reflect national strategy and the evidence base supporting  
496 this provision.

497

498 Midwives involved in providing support experienced improved connections with mothers  
499 and providing continuity as personally fulfilling, as well as recognising the benefit of  
500 continuity to mothers' wellbeing and pregnancy outcomes [31]. Midwives felt their  
501 knowledge had increased as a result of being involved in moderating an online community,  
502 learning from mothers' questions and experiences. Health professional moderators  
503 commonly report increased learning and research opportunities, and that the role can be  
504 personally and professionally empowering [32]. Midwives in the personal use only group  
505 were less likely to perceive these benefits, or the potential for engaging online to support



506 continuing professional development. Findings suggest this may be a missed opportunity  
507 and that widening access to midwife moderator roles would benefit individuals and services.

508

509 Midwives expressed fears for their own privacy, security and a desire to avoid blurring  
510 boundaries between personal and professional online space. Social media use requires  
511 energy and cognitive processing that can cause overload and fatigue [33], and additional  
512 professional use may increase these risks, creating anxiety, stress and rumination [34,35].

513 There was concern about differentiating between being 'on' and 'off' duty when an online  
514 workplace is accessible around the clock and carried in a pocket. They feared becoming  
515 emotionally involved and overstepping boundaries. Some shared experiences of midwives  
516 being identified or targeted on Facebook, or having information they had shared taken out  
517 of context, creating fear this would occur in a group setting. However, these concerns were  
518 significantly associated with those not already involved in offering support, indicating that  
519 group formats and guidelines can support mutually respectful interactions [20]. Notably,  
520 around a third of those offering support online had concerns about doing so, suggesting  
521 their belief in the benefits motivated them to manage their concerns/accept a level of  
522 perceived risk in order to offer this support. Further research is needed to understand how  
523 personal and professional social media 'roles' and 'profiles' can be delineated to protect  
524 midwives and their wellbeing and promote effective practice.

525

526 Participants were also concerned about the potential increased workload and stress arising  
527 from a social media role. Linked to this are wider issues of the systemic undervaluing of  
528 midwives work and skills [36], including regularly missed breaks and unpaid overtime [37].  
529 Existing understaffing has been compounded by Brexit and the pandemic, with Heads of

530 Midwifery reporting that services frequently rely on the goodwill of staff to keep going [36].  
531 Fair pay has been an ongoing issue over the last decade, with the value of midwives' wages  
532 decreasing in real terms by over £7000 since 2010 [38]. The systemic undervaluing of their  
533 work and skills has exacerbated low morale, contributing to almost three quarters of  
534 midwives considering permanently leaving the profession [36]. Few midwives providing  
535 Facebook support were being paid to do so, even where this was part of their employed  
536 role. The majority were doing so outside an employed role and in their own time, and most  
537 had no local guidelines to support the role. One participant described the sudden  
538 acknowledgement of social media support during the COVID-19 pandemic as worthy of paid  
539 time, as 'a kick in the guts', expressing the frustration of those midwives seeking recognition  
540 for the time and skills they invest in this [and all] provision. Social media roles, where there  
541 are no guidelines, working hours or remuneration in place, clearly carry a risk of  
542 exacerbating existing work-based inequities and increasing pressures.

543

544 These findings are a concern, demonstrating a failure to support, safeguard and remunerate  
545 midwives who provide a service that mothers seek and services benefit from [11]. In  
546 addition to the potential personal and professional risks being shouldered by midwives, this  
547 situation also prevents effective auditing of any midwife-led online support to ensure its  
548 quality, efficacy, safety and accessibility. Being able to identify who is moderating a group is  
549 key to how mothers engage with and perceive its reliability [10,11]. It is therefore vital that  
550 services ensure midwife moderated groups are part of a robust, professional and  
551 accountable digital service [2].

552

553 While midwives in the sample often presented binary views of Facebook support as a  
554 benefit or a threat to care and services, they were aware that women’s expectations in  
555 relation to digital communication are changing. However, concerns were expressed that  
556 social media support would be relied upon to replace and justifying reduced resourcing of  
557 face-to-face services. Clearly new approaches to offering support will be needed, but these  
558 must be based on evidence, meet mothers’ needs and be integrated with care into the role  
559 of the midwife. The findings support wider research, highlighting a desire to understand  
560 ‘cybercivility’ [appropriate online engagement] and develop skills in digital professionalism  
561 [39]. This need has been brought into focus by the rapid digitalisation of services during  
562 COVID-19 [24]. Overall, findings highlight that further training is needed, and that midwives  
563 are eager to engage where guidance exists, and where policy supports practice.

564

565 The research does have limitations. This was an exploratory study in a new area which relied  
566 on large scale recruitment online, attracting participation amongst midwives and student  
567 midwives via social media posts and online sharing. Whilst efficient, this recruitment  
568 method meant those midwives active on social media may be more likely to respond and  
569 will have attracted those most motivated to take part. Although efforts were made to share  
570 the link to participate via the RCM channels and sharing encouraged outside social media  
571 were encouraged, those who choose not to use social media are less likely to have been  
572 represented. Just 1.3% of study participants were non-Facebook users, compared to 33% of  
573 the UK population, and 14.5% of 25-40 year olds [40]. Whilst this may be partially a result of  
574 the internet data collection methods, the demographic of midwives and student midwives  
575 in the sample reflected the childbearing women they care for [the majority being female  
576 and aged 22-40 years], who themselves represent the largest number of social media users

577 [5]. It is unsurprising therefore that almost all participants were active Facebook users, that  
578 95.1% find the platform convenient and easy to use and that 77.6% also used other social  
579 media such as Twitter or Instagram. Limitations of data collection methods aside, these  
580 findings suggest that much of the midwifery workforce is familiar with using social media for  
581 personal use, potentially providing a strong foundation for developing skills for the  
582 midwifery moderator role. However, many participants also expressed strongly held views  
583 about the personal nature of their Facebook use and a desire to keep professional life and  
584 engagement with women separate. Overall, 44% stated they would not consider a role that  
585 involved offering Facebook support in future. It is evident that digital skills present less of a  
586 barrier than the pervasive conception of social media use as unprofessional.

587

588 Similarly, although our sample was predominantly from White or White British backgrounds  
589 [93%], this number and the representation of other ethnic groups reflects the number of  
590 registered midwives from these backgrounds in the UK [21].

591

592 The questionnaire design relied on self-reports and although anonymous, social desirability  
593 bias should be considered in survey responses by professionals [41]. Social media use by  
594 midwives is presented as professionally problematic by educators, employers and  
595 professional bodies, which could lead to denying involvement or exaggerating negative  
596 views. However, participants were self-selecting and questions carefully worded to minimise  
597 any bias.

598 Limitations aside, this study has demonstrated that there are significant perceived personal  
599 and professional barriers to the integration of Facebook as a tool for supporting mothers

600 into midwifery practice. Despite strategic goals encouraging social media interaction and the  
601 impact of the COVID-19 pandemic on delivering digital communication, progress in  
602 maternity services remains slow. Mixed messages between local and national policies and  
603 defensive social media policies are causing fear amongst midwives. A lack of support from  
604 employers and resistance from midwifery educators is preventing creative approaches to  
605 overcoming the complexities of using Facebook to support families. It is clear midwife  
606 moderated Facebook support has the potential to support skill development, improve  
607 communication and meet women’s needs. However, the application of the knowledge, skill  
608 and passion of midwives to delivering support via social media needs wider exploration to  
609 ensure access is equitable, appropriately resourced and midwives are supported, protected  
610 and remunerated. Further research also needs to establish how appropriate digital  
611 professionalism training can be developed and implemented to reduce fear and improve  
612 engagement. This is vital if maternity services are to meet mothers’ expectations for digital  
613 access to support, and strategic goals for digital transformation.

614

## 615 **Materials & methods**

### 616 **Participants**

617 The sample was a convenience sample recruited online between 1<sup>st</sup> August and 30<sup>th</sup>  
618 September 2020. Inclusion criteria were: aged over 18 or over, a registered midwife or  
619 student midwife in the UK and who gave consent to participate in the survey in English.  
620 Responses were received from regions across the UK. Ethical approval was granted by a  
621 University Research Ethics Committee. All participants gave informed consent to take part in  
622 the study.

623

## 624 **Questionnaire Design**

625 An exploratory online survey, consisting of open and closed questions, was used to collect  
626 data on the attitudes of midwives towards Facebook use, the benefits and challenges of  
627 developing the midwife's role in Facebook group provision, and barriers to development of  
628 the service. Participants completed an online questionnaire asking them about their  
629 experiences and/or perceptions of the use of Facebook to provide mothers with support.

630 The questionnaire included items exploring:

631

- 632 • Age, gender and ethnicity. Participants also gave employment details including whether  
633 they were currently a student, or how long they had been a midwife and any specialist  
634 roles. County area was also collected to determine the geographic spread of  
635 participants.
- 636 • Measures of Facebook use: including type of use and perceptions of use.
- 637 • Format of Facebook support roles: including types of support, responsibilities held, time  
638 spent and reimbursement.
- 639 • Perceptions of Facebook support roles: including any additional breastfeeding  
640 qualifications, perceptions of impact of groups on mothers and midwives.
- 641 • Training and support for Facebook roles: including any training and/or guidelines  
642 received or perceived as needed.

643

644 The questionnaire was piloted prior to sharing more widely. It was completed by 3 midwives  
645 and five student midwives. Feedback from initial participants was positive on structure and  
646 content. No changes were required.

647

## 648 **Procedure**

649 Participants were recruited to the study using an advertisement with a link to the online  
650 questionnaire, hosted by Qualtrics. Facebook groups aimed at midwives and students [such  
651 as 'Beyond Midwifery UK' and 'Midwives in the making'] were identified via a Facebook  
652 search, with permission sought from group administrators for posting study information to  
653 the group or page. The advertisement and link were shared to these groups and to  
654 midwifery related Facebook pages and shared by members and on the Royal College of  
655 Midwives [RCM] website. It was also shared more broadly across social media. If  
656 participants were interested in taking part, they clicked on the link where the participant  
657 information sheet and consent questions loaded. A short debrief was included at the end of  
658 the questionnaire with details of how to contact the research team or seek further support  
659 if needed.

660

## 661 **Data Analysis**

662 Data were descriptively analysed using frequencies and percentages using SPSS v26.  
663 Participants were asked to indicate whether they used Facebook [Not at all, personal/social  
664 use, to provide professional support to women]. Non-users were directed only to questions  
665 on views, omitting use and experiences. As the research questions focus on understanding  
666 the experiences of Facebook users [and the non-user sample very small], non-user

667 responses were excluded from some analyses. Where non-users are included, results refer  
668 to all participants.

669

670 Chi square tests were carried out to compute associations between type of Facebook use  
671 [personal/social use, professional support use] and age range, specialist role, group  
672 recommendations and receipt of training. T tests were performed to compare attitudes to  
673 mothers and midwives' use of Facebook support groups and level of concern about their use  
674 for the two Facebook use groups. County area data were analysed for distribution frequency  
675 using Google My Maps.

676

677 Thematic analysis was conducted to explore patterns and connections within the qualitative  
678 data. After familiarisation with the data, initial codes were produced, identifying themes  
679 which were reviewed in relation to the coded extracts, defined and named. These were  
680 reviewed by a second researcher and discussed until agreement reached [42]. A reflexive  
681 journal was used to reflect on methodological decisions and the researcher's midwifery  
682 background. Results were audited by the second researcher, providing feedback on the  
683 adequacy of data, development of findings and the interpretive perspective [43].

684

## 685 **References**

686 1) Tranter R, McGraw C. Integrating social media into routine midwifery services:  
687 Maternity Direct. *British journal of midwifery*. 2017;25(7):458–64.

688



- 689 2) Public Accounts Committee. *Digital transformation in the NHS*. Report number:  
690 HC680, 2020 Available from:  
691 <https://committees.parliament.uk/publications/3315/documents/31262/default/>  
692 [Accessed on 8<sup>th</sup> April 2022]  
693
- 694 3) Royal College of Midwives. *Written evidence submitted by the Royal College of*  
695 *Midwives: Digital transformation in the NHS*. Available from:  
696 [https://www.rcm.org.uk/media/4300/response-to-consultation-on-digital-](https://www.rcm.org.uk/media/4300/response-to-consultation-on-digital-transformation-in-the-nhs.pdf)  
697 [transformation-in-the-nhs.pdf](https://www.rcm.org.uk/media/4300/response-to-consultation-on-digital-transformation-in-the-nhs.pdf) [Accessed 8<sup>th</sup> April 2022]  
698
- 699 4) Hitchings R. *The impact of Covid-19 on the use of digital technology in the NHS*.  
700 Available from: [https://www.nuffieldtrust.org.uk/files/2020-08/the-impact-of-covid-](https://www.nuffieldtrust.org.uk/files/2020-08/the-impact-of-covid-19-on-the-use-of-digital-technology-in-the-nhs-web-2.pdf)  
701 [19-on-the-use-of-digital-technology-in-the-nhs-web-2.pdf](https://www.nuffieldtrust.org.uk/files/2020-08/the-impact-of-covid-19-on-the-use-of-digital-technology-in-the-nhs-web-2.pdf) [Accessed on 8<sup>th</sup> April  
702 2022]  
703
- 704 5) Office for National Statistics. *Social networking by age group, 2011 to 2017*. Available  
705 from:  
706 [https://www.ons.gov.uk/peoplepopulationandcommunity/householdcharacteristics/](https://www.ons.gov.uk/peoplepopulationandcommunity/householdcharacteristics/homeinternetandsocialmediausage/adhocs/007401socialnetworkingbyagegroup2011to2017)  
707 [homeinternetandsocialmediausage/adhocs/007401socialnetworkingbyagegroup201](https://www.ons.gov.uk/peoplepopulationandcommunity/householdcharacteristics/homeinternetandsocialmediausage/adhocs/007401socialnetworkingbyagegroup2011to2017)  
708 [1to2017](https://www.ons.gov.uk/peoplepopulationandcommunity/householdcharacteristics/homeinternetandsocialmediausage/adhocs/007401socialnetworkingbyagegroup2011to2017). [Accessed on 8<sup>th</sup> April 2022]  
709
- 710 6) Skelton K, Evans R, LaChenaye J. Hidden communities of practice in social media  
711 groups: Mixed methods study. *Journal of medical Internet research*.  
712 2020;22(3):e14355–e14355.

713

714 7) Regan S, Brown A. Experiences of online breastfeeding support: Support and  
715 reassurance versus judgement and misinformation. *Maternal and child nutrition*.  
716 2019;15(4):e12874.

717

718 8) Ellis L, Roberts L. Exploring the use and quality of Internet discussion forums in  
719 pregnancy: A qualitative analysis. *Birth*. 2019; 47(1). Available from:  
720 <https://doi.org/10.1111/birt.12459>

721

722 9) Mackintosh N, Agarwal S, Adcock K, Armstrong N, Briley A, Patterson, M, Sandall, J,  
723 (Sarah) Gong Q. Online resources and apps to aid self-diagnosis and help seeking in  
724 the perinatal period: A descriptive survey of women's experiences. *Midwifery*. 2020;  
725 90, 102803–102803. Available from: <https://doi.org/10.1016/j.midw.2020.102803>

726

727 10) McCarthy R, Byrne G, Brettle A, Choucri L, Ormandy P, Chatwin J. Midwife-  
728 moderated social media groups as a validated information source for women during  
729 pregnancy. *Midwifery*, 2020; 88: 102710. Available from:  
730 <https://doi.org/10.1016/j.midw.2020.102710>

731

732 11) Morse H, Brown A. Accessing local support online: Mothers' experiences of local  
733 Breastfeeding Support Facebook groups. *Maternal & child nutrition*. 2021; 17(4),  
734 e13227. Available from: <https://doi.org/10.1111/mcn.13227>

735

- 736 12) McNab C. What social media offers to health professionals and citizens. *Bulletin of*  
737 *the World Health Organization*. 2009; 87(8): 566.  
738
- 739 13) Aase S. Toward e-professionalism: thinking through the implications of navigating  
740 the digital world. *Journal of the American Dietetic Association*. 2010; 110(10).  
741 Available from:  
742
- 743 14) Neville P, Waylen A. Social media and dentistry: some reflections on e-  
744 professionalism. *British Dental Journal*. 2015; 218(8): 475–478. Available from:  
745 <https://doi.org/10.1038/sj.bdj.2015.294>  
746
- 747 15) Ryan G, Jackson J, Cornock M. Exploring public perspectives of e-professionalism in  
748 nursing. *Nursing management*. 2019; 26(6), 29–35. Available from:  
749 <https://doi.org/10.7748/nm.2019.e1870>  
750
- 751 16) Griffin G, Williams N, Bradfield Z, Hauck YL. E-professionalism and social media use  
752 amongst nurses and midwives: A cross-sectional study. *Nurse Education in Practice*.  
753 2021; 57. Available from: <http://dx.doi.org/10.1016/j.nepr.2021.103248>  
754
- 755 17) McGrath L, Swift A, Clark M, Bradbury-Jones C. Understanding the benefits and risks of  
756 nursing students engaging with online social media. *Nursing Standard*. 2019; 34(10):45-  
757 49. Available from: doi: 10.7748/ns.2019.e11362  
758

- 759 18) Jones S, Chudleigh M, Baines R, Jones RB. Did introducing Twitter and digital  
760 professionalism as an assessed element of the nursing curriculum impact social  
761 media related incidence of 'Fitness to Practise': 12-year case review. *Nurse education*  
762 *in practice*. 2021; 50, 102950. Available from:  
763 <https://doi.org/10.1016/j.nepr.2020.102950>  
764
- 765 19) Dalton J., Rodger D., Wilmore M, Skuse A., Humphreys S, Flabouris M, et al. “Who’s  
766 afraid?”: Attitudes of midwives to the use of information and communication  
767 technologies (ICTs) for delivery of pregnancy-related health information. *Women*  
768 *and birth : journal of the Australian College of Midwives*. 2014;27(3):168–73.  
769
- 770 20) McCarthy R, Choucric L, Ormandy P, Brett A. Midwifery continuity: The use of social  
771 media. *Midwifery*. 2017; 52:34–41.  
772
- 773 21) Nursing and Midwifery Council. *Diversity data 2018-2019*. Available from:  
774 [https://www.nmc.org.uk/globalassets/sitedocuments/annual-reports-and-accounts](https://www.nmc.org.uk/globalassets/sitedocuments/annual-reports-and-accounts/edi/edi-2018-19-data-tables.pdf)  
775 [s/edi/edi-2018-19-data-tables.pdf](https://www.nmc.org.uk/globalassets/sitedocuments/annual-reports-and-accounts/edi/edi-2018-19-data-tables.pdf) [Accessed 8th April 2022]  
776
- 777 22) Mingo F. *How can we better support pregnant women digitally?* RCM Virtual  
778 Conference. 7<sup>th</sup> October 2020.  
779
- 780 23) Black R, McLaughlin M, Giles, M. Women's experience of social media breastfeeding  
781 support and its impact on extended breastfeeding success: A social cognitive

- 782 perspective. *British Journal of Health Psychology*. 2020; 25(3): 754-771. Available  
783 from: doi: 10.1111/bjhp.12451
- 784
- 785 24) Jardine J, Relph S, Magee L, Dadelszen P, Morris E, Ross-Davie M, Draycott T, Khalil A  
786 Maternity services in the UK during the coronavirus disease 2019 pandemic: a  
787 national survey of modifications to standard care. *BJOG : an International Journal of*  
788 *Obstetrics and Gynaecology*. 2021; 128(5), 880–889. Available from:  
789 <https://doi.org/10.1111/1471-0528.16547>
- 790
- 791 25) Chatwin J, Butler D, Jones J, James L, Choucri L, McCarthy R. Experiences of pregnant  
792 mothers using a social media based antenatal support service during the COVID-19  
793 lockdown in the UK: Findings from a user survey. *BMJ open*. 2021;11(1):e040649–  
794 e040649.
- 795
- 796 26) Einion A. The Medicalisation of Childbirth. In: Squire C (ed.) *The Social Context of*  
797 *Birth*. 3<sup>rd</sup> Edition. London. Routledge; 2017. p.181-192.
- 798
- 799 27) Nursing and Midwifery Council. *The Code*. Available from:  
800 <https://www.nmc.org.uk/standards/code/> [Accessed 8th April 2022]
- 801
- 802 28) Cain J, Romanelli F. E-professionalism: a new paradigm for a digital age. *Currents in*  
803 *pharmacy teaching and learning*. 2009;1(2):66–70.
- 804

- 805 29) Scragg B, Shaikh S, Robinson L, Mercer C. Mixed messages: An evaluation of NHS  
806 Trust Social Media policies in the North West of England. *Radiography (London,*  
807 *England 1995)*. 2017;23(3):235–41.
- 808
- 809 30) Nursing and Midwifery Council. Social Media Guidance. Available from:  
810 [https://www.nmc.org.uk/standards/guidance/social-media-guidance/read-social-](https://www.nmc.org.uk/standards/guidance/social-media-guidance/read-social-media-guidance-online/)  
811 [media-guidance-online/](https://www.nmc.org.uk/standards/guidance/social-media-guidance/read-social-media-guidance-online/) [Accessed 8th April 2022]
- 812
- 813 31) Walsh D, Devane D. A Metasynthesis of Midwife-Led Care. *Qualitative health*  
814 *research*. 2012;22(7):897–910.
- 815
- 816 32) Atanasova S, Kamin T, Petrič G. Exploring the benefits and challenges of health  
817 professionals’ participation in online health communities: Emergence of  
818 (dis)empowerment processes and outcomes. *International Journal of Medical*  
819 *Informatics*, 2016; 98:13–21. Available from:
- 820
- 821 33) Islam AKMN, Whelan E, Brooks S. Does multitasking computer self-efficacy mitigate  
822 the impact of social media affordances on overload and fatigue among  
823 professionals? *Information Technology & People*. 2020; 34(5):1439–61. Available  
824 from: <http://dx.doi.org/10.1108/ITP-10-2019-0548>
- 825
- 826 34) Moqbel M, Kock N. Unveiling the dark side of social networking sites: Personal and  
827 work-related consequences of social networking site addiction. *Information &*

828 *Management*. 2018; 55(1), 109–119. Available from:

829 <https://doi.org/10.1016/j.im.2017.05.001>

830

831 35) Majid A, Yasir M, Javed A, Ali P, From envy to social anxiety and rumination: How

832 social media site addiction triggers task distraction amongst nurses. *Journal of*

833 *Nursing Management*. 2020; 28(3), 504–513. Available from:

834 <https://doi.org/10.1111/jonm.12948>

835

836 36) Murphy G. *RCM calls for ‘a decent pay deal’ amid staffing shortages, fears for safety*

837 *low morale and burnout*. Available from: [https://www.rcm.org.uk/media-](https://www.rcm.org.uk/media-releases/2021/january/rcm-calls-for-a-decent-pay-deal-amid-staffing-shortages-fears-for-safety-low-morale-and-burnout/)

838 [releases/2021/january/rcm-calls-for-a-decent-pay-deal-amid-staffing-shortages-](https://www.rcm.org.uk/media-releases/2021/january/rcm-calls-for-a-decent-pay-deal-amid-staffing-shortages-fears-for-safety-low-morale-and-burnout/)

839 [fears-for-safety-low-morale-and-burnout/](https://www.rcm.org.uk/media-releases/2021/january/rcm-calls-for-a-decent-pay-deal-amid-staffing-shortages-fears-for-safety-low-morale-and-burnout/) [Accessed 8<sup>th</sup> April 2022]

840

841 37) Royal College of Midwives. *Midwives missing meals and loo breaks to keep services*

842 *running*. Available from: [https://www.rcm.org.uk/media-](https://www.rcm.org.uk/media-releases/2020/august/midwives-missing-meals-and-loo-breaks-to-keep-services-running/)

843 [releases/2020/august/midwives-missing-meals-and-loo-breaks-to-keep-services-](https://www.rcm.org.uk/media-releases/2020/august/midwives-missing-meals-and-loo-breaks-to-keep-services-running/)

844 [running/](https://www.rcm.org.uk/media-releases/2020/august/midwives-missing-meals-and-loo-breaks-to-keep-services-running/) [Accessed 8<sup>th</sup> April 2022]

845

846 38) Sorby A. *Midwives skipping breaks and working overtime*. Available from:

847 [https://www.rcm.org.uk/news-views/rcm-opinion/2020/midwives-skipping-breaks-](https://www.rcm.org.uk/news-views/rcm-opinion/2020/midwives-skipping-breaks-and-working-overtime/)

848 [and-working-overtime/](https://www.rcm.org.uk/news-views/rcm-opinion/2020/midwives-skipping-breaks-and-working-overtime/) [Accessed 8<sup>th</sup> April 2022]

849

850 39) De Gagne JC, Covington K, Conklin JL, Yamane SS, Kim SS. Learning cybercivility: A

851 qualitative needs assessment of health professions students. *Journal of Continuing*

- 852            *Education in Nursing*. 2018; 49(9): 425-431. Available from:
- 853            <http://dx.doi.org/10.3928/00220124-20180813-08>
- 854
- 855            40) Statista. *Share of Facebook users in the United Kingdom (UK) as of March 2022, by*
- 856            *age group and gender*. Available from
- 857            [https://www.statista.com/statistics/1030057/facebook-users-united-kingdom-age-](https://www.statista.com/statistics/1030057/facebook-users-united-kingdom-age-gender/)
- 858            [gender/](https://www.statista.com/statistics/1030057/facebook-users-united-kingdom-age-gender/) [Accessed 8<sup>th</sup> April 2022]
- 859
- 860            41) Bergen N, Labonté R “Everything Is Perfect, and We Have No Problems”: Detecting
- 861            and Limiting Social Desirability Bias in Qualitative Research. *Qualitative Health*
- 862            *Research*. 2020; 30(5): 783–792. Available from:
- 863            <https://doi.org/10.1177/1049732319889354>
- 864
- 865            42) Braun V, Clarke V. What can “thematic analysis” offer health and wellbeing
- 866            researchers? *International journal of qualitative studies on health and well-being*.
- 867            2014; 9(1):26152–26152.
- 868
- 869            43) Lincoln YS, Guba EG. *Naturalistic inquiry*. Newbury Park, CA: Sage; 1985.
